# Supplementary material for: Dual-initiator alkoxyamines with an N-tert-butyl-N-(1-diethylphosphono-2,2-dimethylpropyl) nitroxide moiety for preparation of block co-polymers
Source: Royal Society of Chemistry journal article supplement (doi:10.1039/c6ra27231b), 2017-01-01
Supplement: c6ra27231b1.pdf [file c6ra27231b1.pdf]

## Supporting Information

for

### **Dual-initiator alkoxyamines with an N-tert-butyl-N-(1-diethylphosphono-2,2-dimethylpropyl) nitroxide moiety for preparation of block co-polymers**

Gérard Audran,<sup>a</sup> Elena Bagryanskaya,<sup>b,c</sup> Mariya Edeleva,<sup>b,c\*</sup> Sylvain R. A. Marque,<sup>a,b\*</sup> and  
Toshihide Yamasaki<sup>a</sup>

<sup>a</sup> Aix Marseille Univ, CNRS, ICR, UMR 7273, case 551, Avenue Escadrille Normandie-Niemen, 13397 Marseille Cedex 20 France.

E-mail: [sylvain.marque@univ-amu.fr](mailto:sylvain.marque@univ-amu.fr)

<sup>b</sup> N. N. Vorozhtsov Novosibirsk Institute of Organic Chemistry SB RAS, Pr. Lavrentjeva 9, 630090 Novosibirsk, Russia.

[edeleva@nioch.nsc.ruc](mailto:edeleva@nioch.nsc.ruc)

<sup>c</sup> Novosibirsk State University, Pirogova str. 2, 630090 Novosibirsk, Russia.

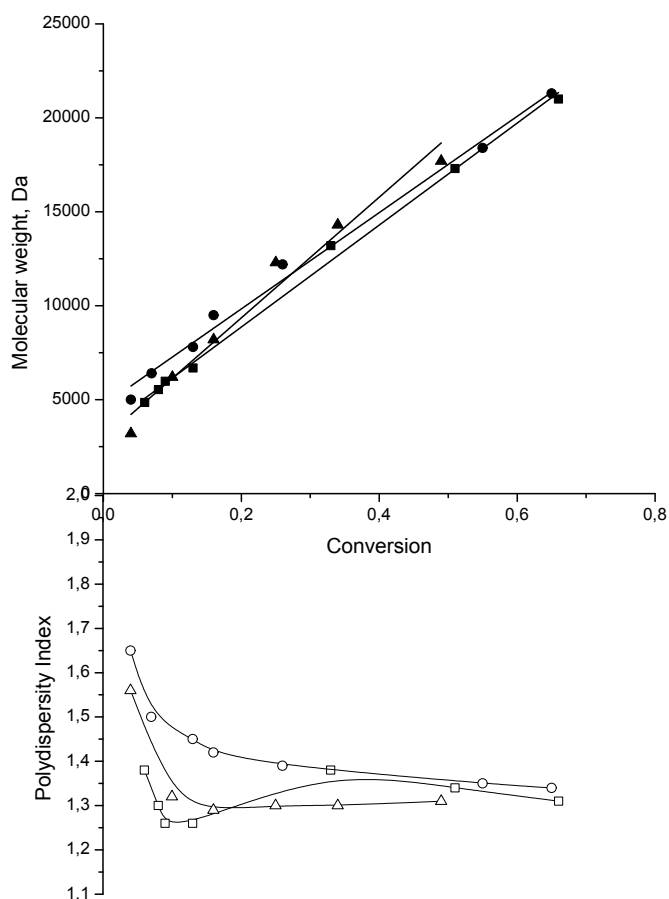

Fig. 1SI. Comparison of  $M_n$  vs. conversion (full symbols) and polydispersity vs. conversion (empty symbols) plots for of styrene polymerization at 110 °C in mass initiated with  $\mathbf{3e}$  ( $\blacksquare$ ,  $\square$ ),  $\mathbf{K3f}$  ( $\bullet$ ,  $\circ$ ) and  $\mathbf{Zn(3f)_2}$  ( $\blacktriangle$ ,  $\triangle$ ).

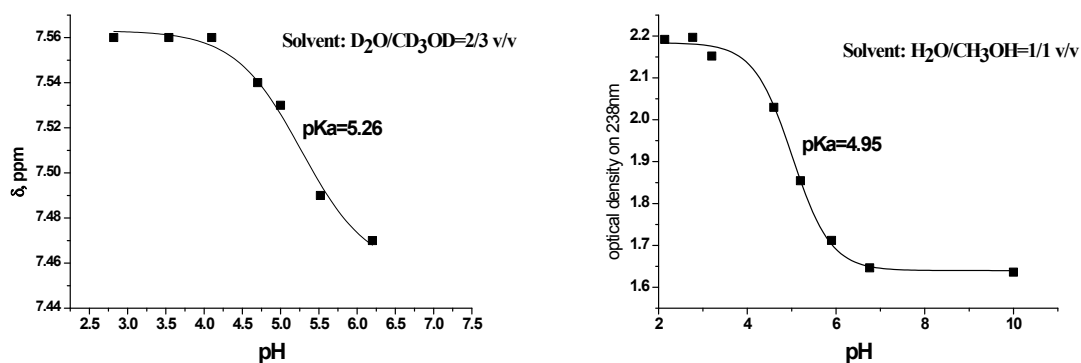

Fig. 2SI. Titration curves for alkoxyamine  $\mathbf{3e}$  in deuterated solvent (left) and in common solvent (right). The values of  $\text{pK}_a$  are listed in the graphs.
